# Supplementary material for: Comparison of the Efficacy of Azithromycin Versus Doxycycline in Acne Vulgaris: A Meta-Analysis of Randomized Controlled Trials
Source: PubMed Central journal article supplement — Ann Dermatol. 2018 Jun 28;30(4):417–26. doi: 10.5021/ad.2018.30.4.417 (PMC6029975; doi:10.5021/ad.2018.30.4.417), 2018-06-28
Supplement: ad-30-417-s002.pdf [file ad-30-417-s002.pdf]

**Supplement 2.** Search strategy on MEDLINE, EMBASE, Cochrane Library, SCOPUS, and Web of Science

**MEDLINE**

1. Acne[TIAB] 13205
2. "Acne Vulgaris"[MeSH] 10280
3. 1 OR 2 15466
4. "Azithromycin"[MeSH] OR "Doxycycline"[MeSH] 12141
5. Azithromycin[TIAB] OR Azythromycin[TIAB] OR Zithromax[TIAB] OR Zitromax[TIAB] OR Doxycycline[TIAB] OR Vibramycin[TIAB] 16706
6. 4 OR 5 20363
7. 3 AND 6 242
8. 7 NOT "review"[Publication Type] OR "review literature as topic"[MeSH Terms] 179

**EMBASE**

1. Acne:ab,ti 18394
2. 'acne'/exp 29032
3. 1 OR 2 32012
4. Azithromycin:ab,ti OR Azythromycin:ab,ti OR Zithromax:ab,ti OR Zitromax:ab,ti OR Doxycycline:ab,ti OR Vibramycin:ab,ti 23078
5. 'azithromycin'/exp OR 'doxycycline'/exp 64008
6. 4 OR 5 66297
7. 3 AND 6 1457
8. 7 NOT ('conference review'/it OR 'review'/it) 997
9. 8 NOT 'nonhuman'/de 908

**Cochrane Library**

1. Acne:ti,ab,kw 2642
2. MeSH descriptor: [Acne Vulgaris] explode all trees 907
3. 1 OR 2 2642
4. MeSH descriptor: [Azithromycin] explode all trees 781
5. MeSH descriptor: [Doxycycline] explode all trees 777
6. Azithromycin OR Azythromycin OR Zithromax OR Zitromax OR Doxycycline OR Vibramycin:ti,ab,kw 2839
7. 4 OR 5 OR 6 2839
8. 3 AND 7 77
9. 8/TRIALS 74

**SCOPUS**

1. TITLE-ABS(Acne) 19947
2. INDEXTERMS ( "Acne Vulgaris" OR acne ) 30914
3. 1 OR 2 36123
4. INDEXTERMS(Azithromycin OR Doxycycline) 58379
5. TITLE-ABS(Azithromycin OR Azythromycin OR Zithromax OR Zitromax OR Doxycycline OR Vibramycin) 19788
6. 4 OR 5 62281
7. 3 AND 6 1472
8. 7 AND (EXCLUDE ( DOCTYPE , "re" ) ) 1000

**Web of Science**

1. TOPIC: (Acne) OR TITLE: (Acne) 15582
2. TOPIC: (Azithromycin OR Azythromycin OR Zithromax OR Zitromax OR Doxycycline OR Vibramycin) OR TITLE: (Azithromycin OR Azythromycin OR Zithromax OR Zitromax OR Doxycycline OR Vibramycin) 18238

JE Kim, et al

3. 1 AND 2 283

4. 3 Refined by: [excluding] DOCUMENT TYPES: ( REVIEW ) 250
