# Supplementary figures and images for: Comparison of the Efficacy of Azithromycin Versus Doxycycline in Acne Vulgaris: A Meta-Analysis of Randomized Controlled Trials
Source: PubMed Central journal article supplement — Ann Dermatol. 2018 Jun 28;30(4):417–26. doi: 10.5021/ad.2018.30.4.417 (PMC6029975; doi:10.5021/ad.2018.30.4.417), 2018-06-28

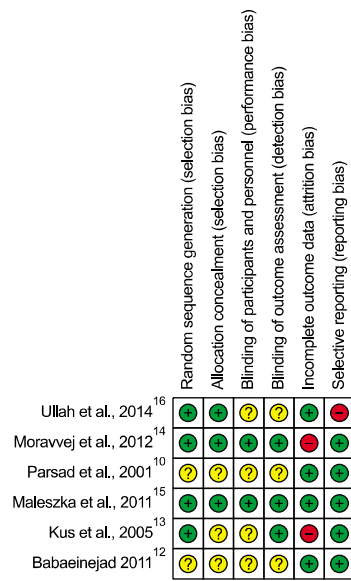

Supplementary Fig. 1. Risk of bias assessment of the included studies.

Supplement: ad-30-417-s003.pdf [file ad-30-417-s003.pdf]
